# Supplementary material for: Revealing regional disparities in the transmission potential of SARS-CoV-2 from interventions in Southeast Asia
Source: PubMed Central journal article supplement (PMC7482285; doi:10.1098/rspb.2020.1173), 2020-08-26
Supplement: rspb20201173supp1.pdf [file rspb20201173supp1.pdf]

# Technical Appendix 1

Revealing regional disparities in the transmission potential of SARS-CoV-2 from interventions in South East A

July 17, 2020

## Contents

|           |                                                                  |           |
|-----------|------------------------------------------------------------------|-----------|
| <b>1</b>  | <b>Change in Baseline Mobility In Residences</b>                 | <b>2</b>  |
| <b>2</b>  | <b>Residence-Only Model Fit Across Regions</b>                   | <b>2</b>  |
| <b>3</b>  | <b>Model Fit Across Regions</b>                                  | <b>3</b>  |
| <b>4</b>  | <b>Residence-Only Kernel Coefficient for TVRN State Equation</b> | <b>3</b>  |
| <b>5</b>  | <b>Kernel Coefficients for TVRN State Equation</b>               | <b>3</b>  |
| <b>6</b>  | <b>All Locality Regression-augmented TVRN</b>                    | <b>6</b>  |
| <b>7</b>  | <b>No Dorms Kernel Coefficients for TVRN State Equation</b>      | <b>9</b>  |
| <b>8</b>  | <b>No Dorms Kernel TVRN State Equation</b>                       | <b>9</b>  |
| <b>9</b>  | <b>Sensitivity Analysis on Serial Interval</b>                   | <b>11</b> |
| 9.1       | Serial Interval Estimates . . . . .                              | 11        |
| 9.2       | State Coefficient Estimates . . . . .                            | 11        |
| 9.3       | Model Fit . . . . .                                              | 11        |
| <b>10</b> | <b>Sensitivity Analysis on Incubation Period</b>                 | <b>12</b> |
| 10.1      | Incubation Period Estimates . . . . .                            | 12        |
| 10.2      | State Coefficient Estimates . . . . .                            | 12        |
| 10.3      | Model Fit . . . . .                                              | 12        |

# 1 Change in Baseline Mobility In Residences

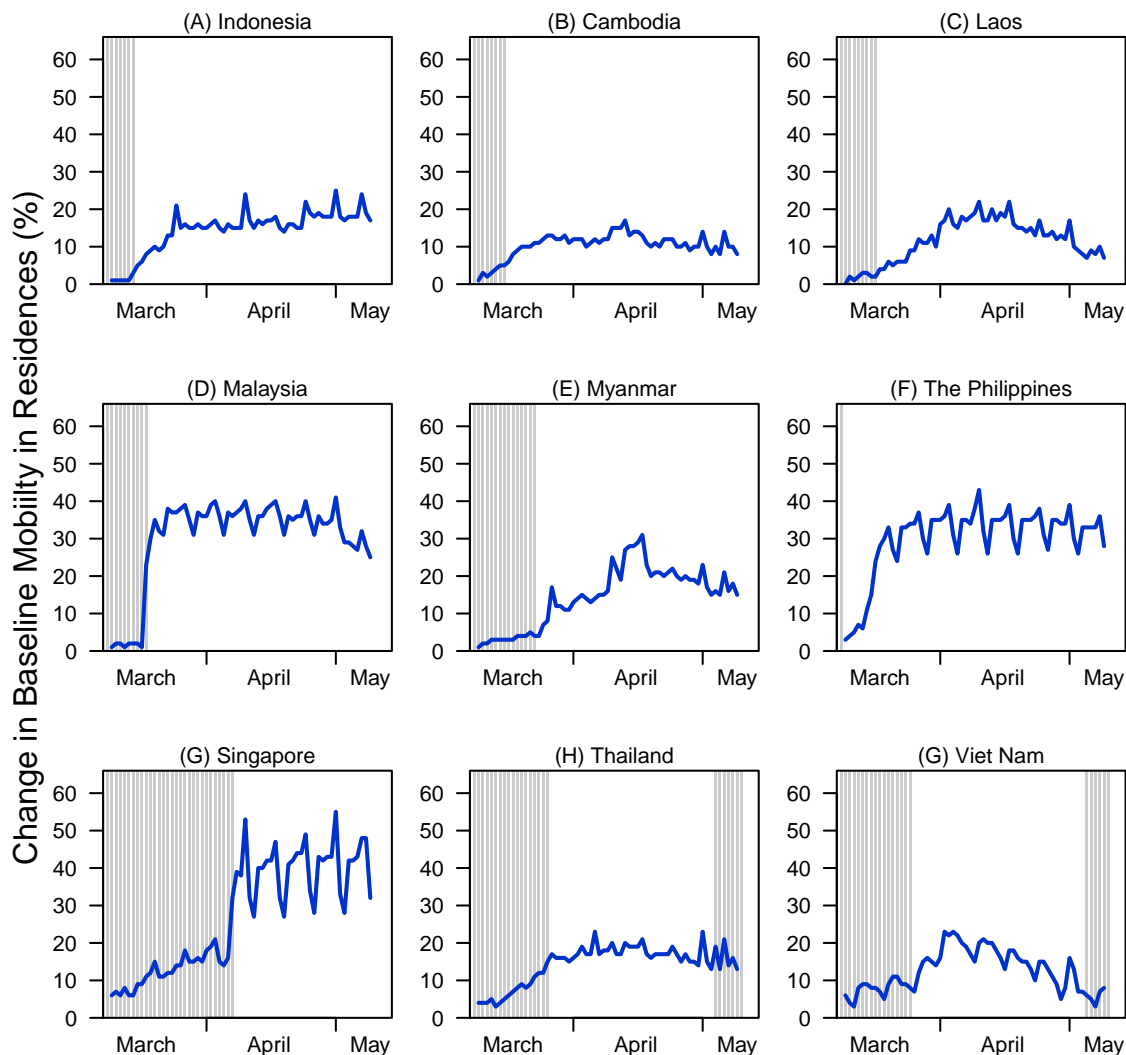

Change in baseline mobility in residences across 9 SEA countries. Time periods with no social distancing policy in place are indicated by gray regions.

# 2 Residence-Only Model Fit Across Regions

|             | MAE State | MAE Observation | $R^2$ State | $R^2$ Observation |
|-------------|-----------|-----------------|-------------|-------------------|
| Indonesia   | 0.20      | 49.92           | 0.86        | 0.85              |
| Cambodia    | 0.13      | 2.16            | 0.86        | 0.22              |
| Laos        | 0.04      | 0.33            | 0.95        | 0.12              |
| Malaysia    | 0.30      | 44.94           | 0.85        | 0.50              |
| Myanmar     | 0.12      | 2.48            | 0.74        | 0.21              |
| Philippines | 0.31      | 63.06           | 0.49        | 0.51              |
| Singapore   | 0.28      | 136.05          | 0.15        | 0.76              |
| Thailand    | 0.28      | 22.24           | 0.83        | 0.78              |
| Vietnam     | 0.14      | 2.24            | 0.81        | 0.51              |

### 3 Model Fit Across Regions

|             | MAE State | MAE Observation | $R^2$ State | $R^2$ Observation |
|-------------|-----------|-----------------|-------------|-------------------|
| Indonesia   | 0.08      | 53.20           | 0.99        | 0.83              |
| Cambodia    | 0.08      | 3.12            | 0.98        | 0.17              |
| Laos        | 0.03      | 0.41            | 1.00        | 0.11              |
| Malaysia    | 0.16      | 67.18           | 0.97        | 0.47              |
| Myanmar     | 0.09      | 2.66            | 0.90        | 0.21              |
| Philippines | 0.25      | 64.46           | 0.91        | 0.50              |
| Singapore   | 0.24      | 137.27          | 0.65        | 0.76              |
| Thailand    | 0.18      | 34.03           | 0.97        | 0.79              |
| Vietnam     | 0.09      | 2.59            | 0.97        | 0.52              |

Table 1: Model Fit Across Regions

### 4 Residence-Only Kernel Coefficient for TVRN State Equation

|             | Posterior Mean | Quantile 2.5% | Quantile 97.5% |
|-------------|----------------|---------------|----------------|
| Indonesia   | -0.109         | -0.127        | -0.092         |
| Cambodia    | -0.154         | -0.196        | -0.110         |
| Laos        | -0.038         | -0.072        | -0.007         |
| Malaysia    | -0.074         | -0.081        | -0.066         |
| Myanmar     | 0.034          | 0.017         | 0.053          |
| Philippines | -0.041         | -0.052        | -0.031         |
| Singapore   | -0.009         | -0.015        | -0.004         |
| Thailand    | -0.145         | -0.162        | -0.128         |
| Viet Nam    | -0.065         | -0.084        | -0.046         |

### 5 Kernel Coefficients for TVRN State Equation

|                                  | Mean   | Quantile 2.5% | Quantile 97.5% |
|----------------------------------|--------|---------------|----------------|
| Intercept                        | 4.705  | 4.148         | 5.248          |
| Retail Change From Baseline      | 0.054  | -0.037        | 0.144          |
| Grocery Change From Baseline     | -0.052 | -0.096        | -0.009         |
| Park Change From Baseline        | -0.025 | -0.080        | 0.030          |
| Transit Change From Baseline     | 0.086  | 0.049         | 0.123          |
| Workplace Change From Baseline   | 0.012  | -0.024        | 0.048          |
| Residential Change From Baseline | 0.116  | -0.024        | 0.256          |

Table 2: Indonesia

|                                  | Mean   | Quantile 2.5% | Quantile 97.5% |
|----------------------------------|--------|---------------|----------------|
| Intercept                        | 6.352  | 5.142         | 7.639          |
| Retail Change From Baseline      | -0.269 | -0.365        | -0.169         |
| Grocery Change From Baseline     | 0.076  | 0.009         | 0.144          |
| Park Change From Baseline        | 0.142  | 0.079         | 0.207          |
| Transit Change From Baseline     | 0.198  | 0.135         | 0.263          |
| Workplace Change From Baseline   | 0.061  | 0.032         | 0.090          |
| Residential Change From Baseline | 0.198  | 0.068         | 0.321          |

Table 3: Cambodia

|                                  | Mean   | Quantile 2.5% | Quantile 97.5% |
|----------------------------------|--------|---------------|----------------|
| Intercept                        | 2.078  | 0.929         | 3.085          |
| Retail Change From Baseline      | -0.129 | -0.188        | -0.043         |
| Grocery Change From Baseline     | 0.010  | -0.056        | 0.072          |
| Park Change From Baseline        | 0.153  | 0.062         | 0.237          |
| Transit Change From Baseline     | 0.083  | 0.038         | 0.119          |
| Workplace Change From Baseline   | 0.059  | 0.027         | 0.089          |
| Residential Change From Baseline | 0.143  | 0.037         | 0.246          |

Table 4: Laos

|                                  | Mean   | Quantile 2.5% | Quantile 97.5% |
|----------------------------------|--------|---------------|----------------|
| Intercept                        | 5.734  | 5.281         | 6.184          |
| Retail Change From Baseline      | 0.049  | 0.020         | 0.079          |
| Grocery Change From Baseline     | -0.047 | -0.062        | -0.033         |
| Park Change From Baseline        | -0.059 | -0.091        | -0.027         |
| Transit Change From Baseline     | 0.111  | 0.075         | 0.147          |
| Workplace Change From Baseline   | -0.053 | -0.076        | -0.029         |
| Residential Change From Baseline | -0.027 | -0.081        | 0.029          |

Table 5: Malaysia

|                                  | Mean   | Quantile 2.5% | Quantile 97.5% |
|----------------------------------|--------|---------------|----------------|
| Intercept                        | 1.613  | 0.892         | 2.366          |
| Retail Change From Baseline      | -0.087 | -0.144        | -0.033         |
| Grocery Change From Baseline     | -0.103 | -0.155        | -0.056         |
| Park Change From Baseline        | -0.036 | -0.092        | 0.019          |
| Transit Change From Baseline     | 0.196  | 0.115         | 0.293          |
| Workplace Change From Baseline   | -0.053 | -0.087        | -0.020         |
| Residential Change From Baseline | -0.105 | -0.235        | 0.024          |

Table 6: Myanmar (Burma)

|                                  | Mean   | Quantile 2.5% | Quantile 97.5% |
|----------------------------------|--------|---------------|----------------|
| Intercept                        | 5.802  | 4.867         | 6.742          |
| Retail Change From Baseline      | 0.008  | -0.034        | 0.050          |
| Grocery Change From Baseline     | -0.011 | -0.030        | 0.007          |
| Park Change From Baseline        | 0.035  | -0.003        | 0.073          |
| Transit Change From Baseline     | 0.021  | -0.013        | 0.055          |
| Workplace Change From Baseline   | -0.005 | -0.041        | 0.032          |
| Residential Change From Baseline | -0.038 | -0.093        | 0.017          |

Table 7: Philippines

|                                  | Mean   | Quantile 2.5% | Quantile 97.5% |
|----------------------------------|--------|---------------|----------------|
| Intercept                        | 2.270  | 1.863         | 2.661          |
| Retail Change From Baseline      | -0.011 | -0.045        | 0.024          |
| Grocery Change From Baseline     | -0.037 | -0.053        | -0.021         |
| Park Change From Baseline        | 0.024  | 0.011         | 0.038          |
| Transit Change From Baseline     | 0.019  | -0.008        | 0.045          |
| Workplace Change From Baseline   | 0.007  | -0.014        | 0.030          |
| Residential Change From Baseline | 0.022  | -0.009        | 0.054          |

Table 8: Singapore

|                                  | Mean   | Quantile 2.5% | Quantile 97.5% |
|----------------------------------|--------|---------------|----------------|
| Intercept                        | 6.272  | 5.740         | 6.814          |
| Retail Change From Baseline      | 0.032  | -0.003        | 0.069          |
| Grocery Change From Baseline     | -0.101 | -0.126        | -0.077         |
| Park Change From Baseline        | -0.079 | -0.132        | -0.025         |
| Transit Change From Baseline     | 0.172  | 0.110         | 0.233          |
| Workplace Change From Baseline   | -0.063 | -0.102        | -0.024         |
| Residential Change From Baseline | -0.060 | -0.158        | 0.037          |

Table 9: Thailand

|                                  | Mean   | Quantile 2.5% | Quantile 97.5% |
|----------------------------------|--------|---------------|----------------|
| Intercept                        | 3.406  | 2.786         | 4.033          |
| Retail Change From Baseline      | -0.057 | -0.088        | -0.026         |
| Grocery Change From Baseline     | -0.109 | -0.149        | -0.067         |
| Park Change From Baseline        | 0.034  | 0.004         | 0.063          |
| Transit Change From Baseline     | 0.158  | 0.114         | 0.203          |
| Workplace Change From Baseline   | 0.005  | -0.010        | 0.018          |
| Residential Change From Baseline | 0.049  | -0.015        | 0.114          |

Table 10: Vietnam

## 6 All Locality Regression-augmented TVRN

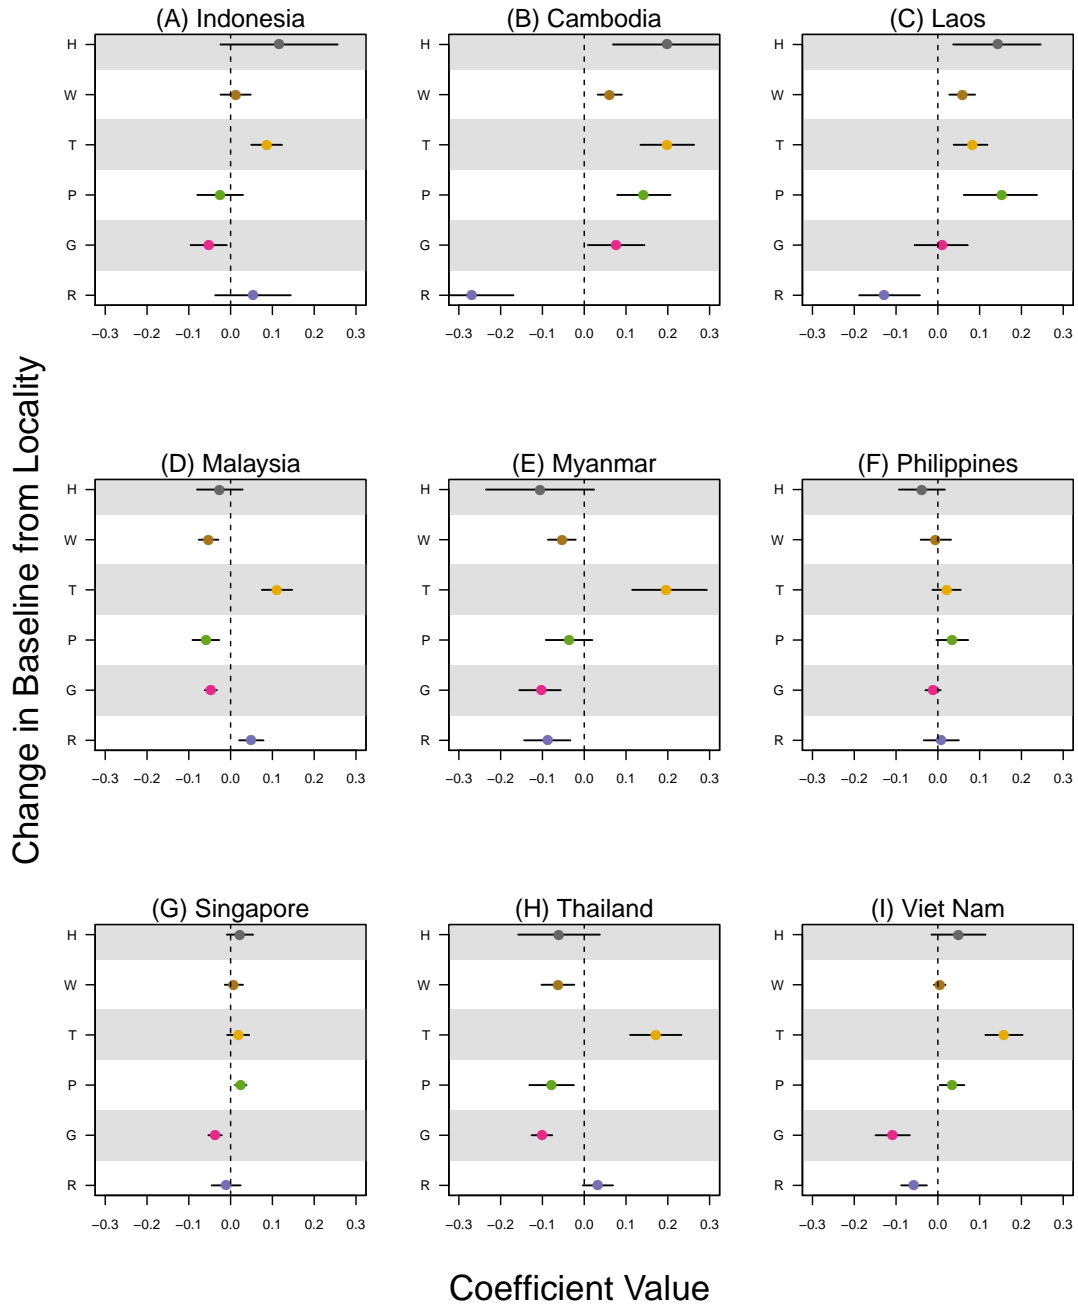

Figure 1: Regression-augmented TVRN state equation coefficients across 9 SEA countries with all CBM variables

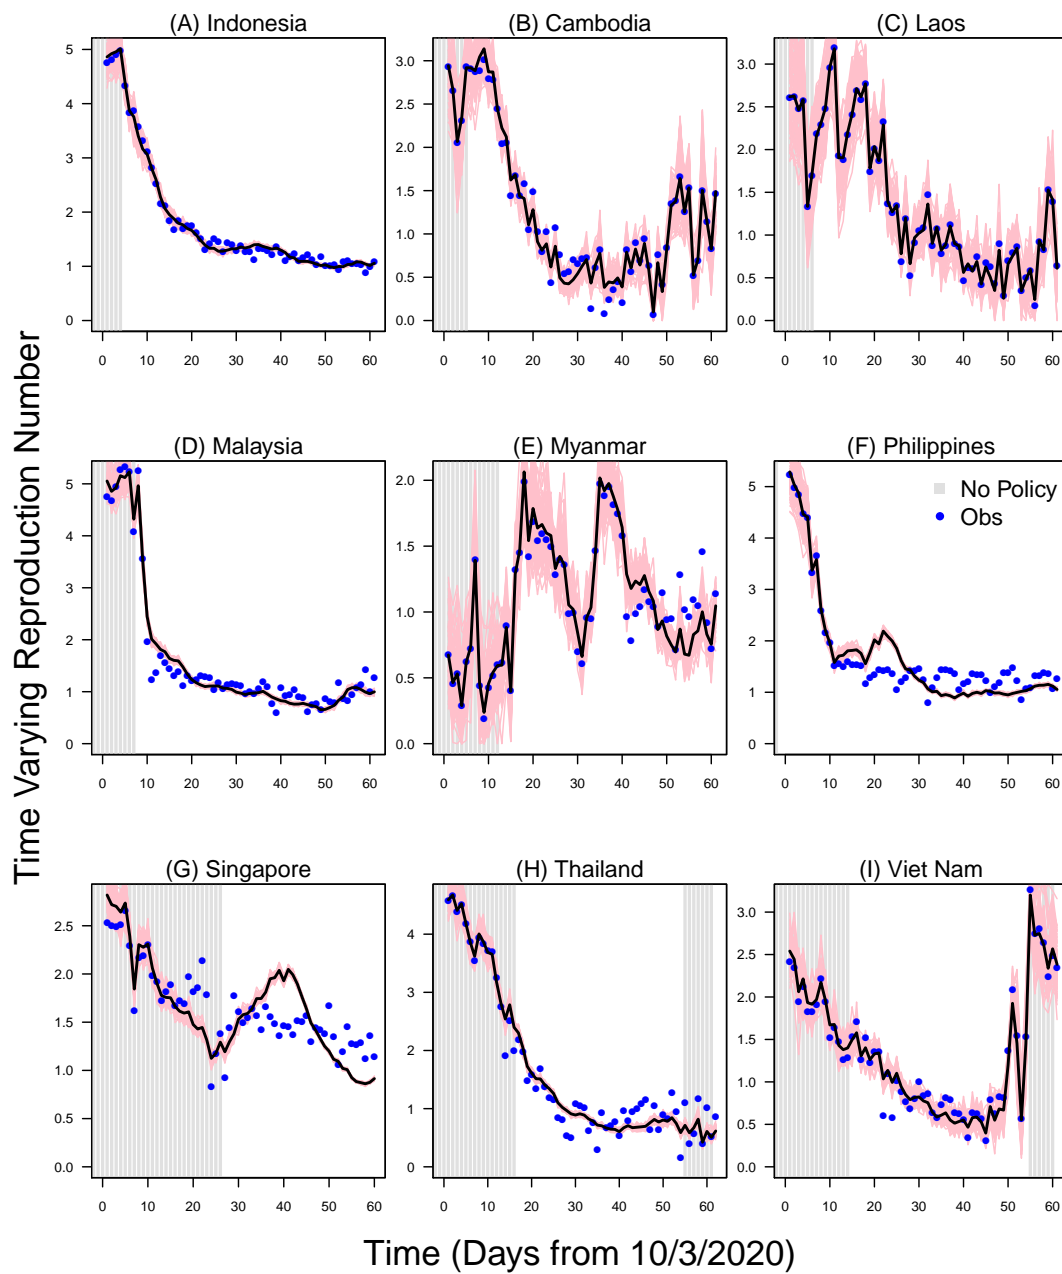

Figure 2: Regression-augmented TVRN across 9 SEA countries with all CBM variables

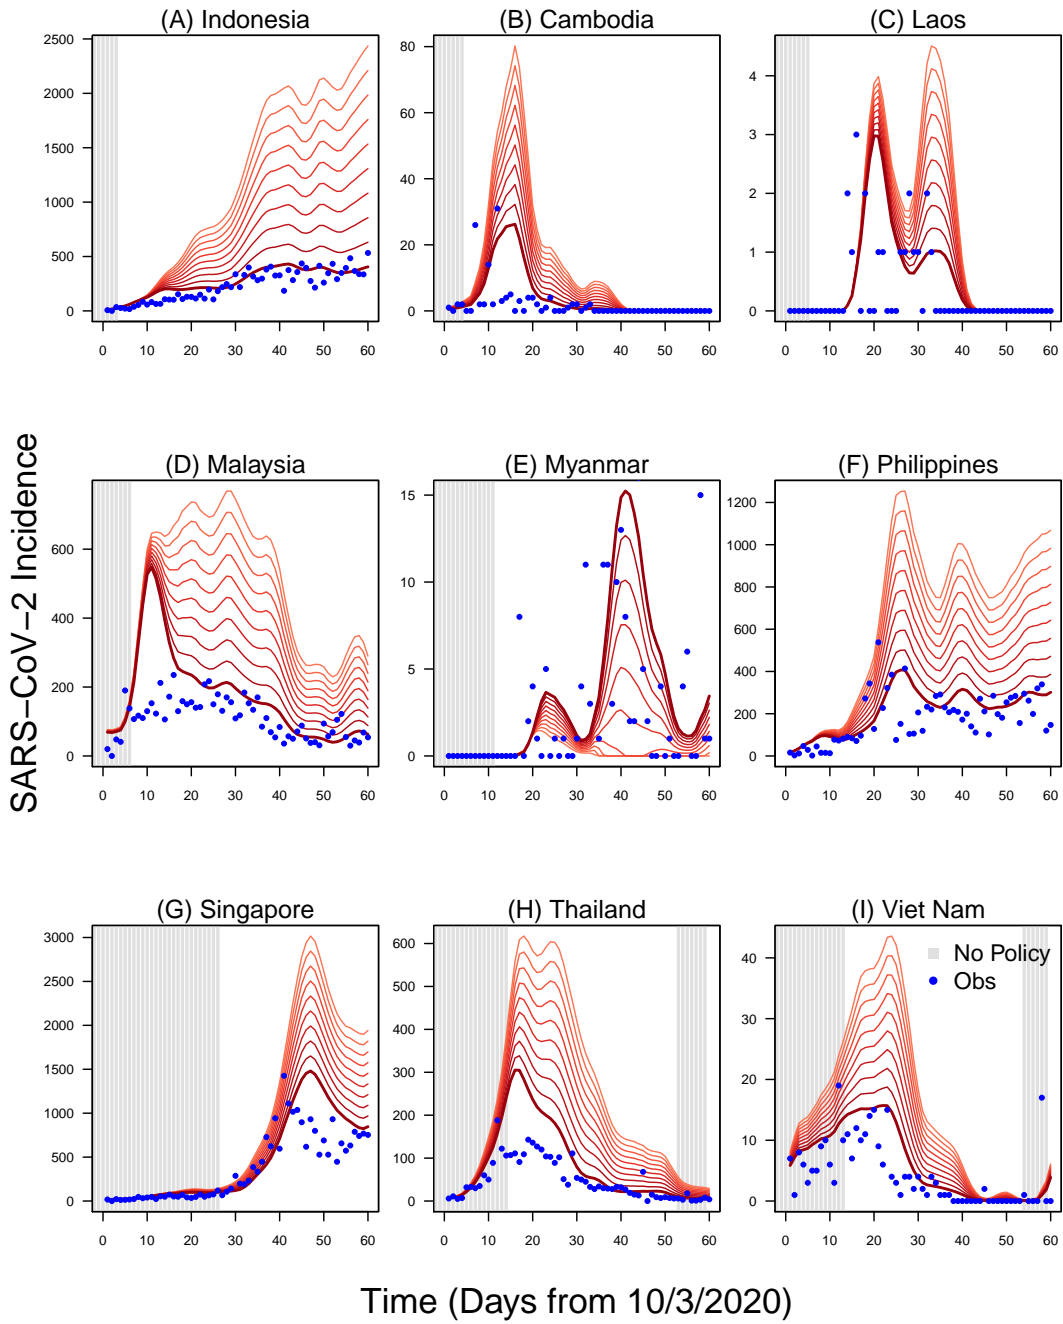

Figure 3: Regression-augmented TVRN interventions across 9 SEA countries



## 7 No Dorms Kernel Coefficients for TVRN State Equation

| Singapore      | Intercept | Residential Change From Baseline |
|----------------|-----------|----------------------------------|
| Mean           | 0.80      | -0.01                            |
| 2.5 Quantile%  | 0.62      | -0.02                            |
| 97.5 Quantile% | 0.98      | -0.01                            |

## 8 No Dorms Kernel TVRN State Equation

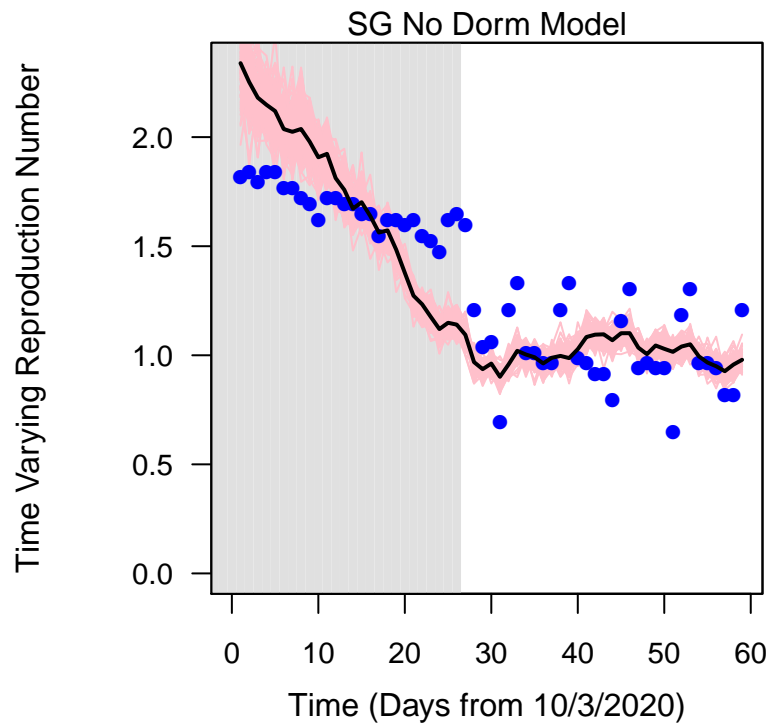

Regression-augmented TVRN for Singapore without COVID-19 Dormitory Case counts

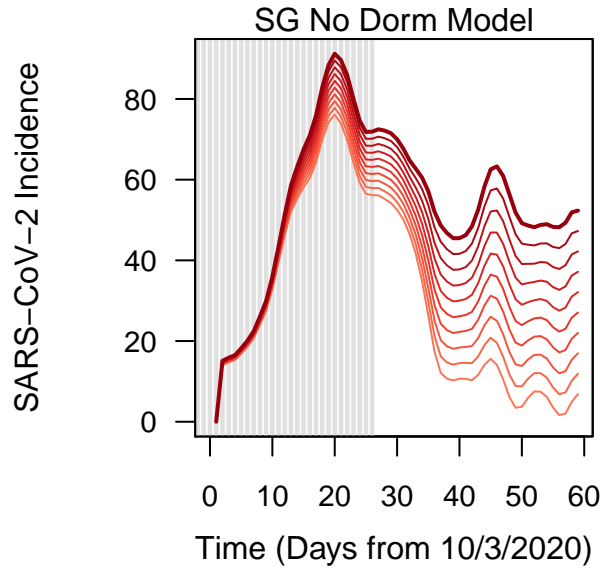

Regression-augmented TVRN for Singapore without COVID-19 Dormitory Case counts

## 9 Sensitivity Analysis on Serial Interval

### Analysis summary

We conducted sensitivity analysis on serial interval estimates by specifying different serial intervals taken from literature while keeping the incubation period fixed at Natalie M Linton et al. 2020's estimate. State coefficient estimates with serial intervals varied are mostly negative, with the direction and effect sizes following that of the primary analysis given in the main manuscript.

### 9.1 Serial Interval Estimates

| Serial Interval (days)       | Reference                                          |
|------------------------------|----------------------------------------------------|
| 4.6 (SD=2)                   | Ferguson et al. 2020                               |
| 3.96 (95% CI 3.53, 4.39)     | Du et al. 2020                                     |
| 4.0 (95% CrI: 3.1, 4.9)      | Nishiura, Natalie M. Linton, and Akhmetzhanov 2020 |
| 4.6 (95% CrI: 3.5, 5.9)      | Nishiura, Natalie M. Linton, and Akhmetzhanov 2020 |
| 5.21 (95% CrI: -3.35, 13.94) | Ganyani et al. 2020                                |
| 3.95 (95% CrI: -4.47, 12.51) | Ganyani et al. 2020                                |

Serial interval estimates taken from literature

### 9.2 State Coefficient Estimates

|    | Du <sup>1</sup> |                  | Nishiura <sup>2</sup> |                  | Gayani SG <sup>3</sup> |                  | Gayani CH <sup>4</sup> |                  |
|----|-----------------|------------------|-----------------------|------------------|------------------------|------------------|------------------------|------------------|
|    | Mean            | 95% CrI          | Mean                  | 95% CrI          | Mean                   | 95% CrI          | Mean                   | 95% CrI          |
| IN | -0.124          | (-0.151, -0.097) | -0.033                | (-0.049, -0.018) | -0.131                 | (-0.157, -0.105) | -0.119                 | (-0.143, -0.094) |
| KH | -0.112          | (-0.172, -0.05)  | -0.12                 | (-0.152, -0.081) | -0.102                 | (-0.162, -0.042) | -0.167                 | (-0.225, -0.107) |
| LA | 0.046           | (0.008, 0.082)   | -0.065                | (-0.097, -0.035) | 0.059                  | (0.025, 0.095)   | 0.032                  | (-0.002, 0.073)  |
| MS | 0.017           | (-0.002, 0.036)  | -0.021                | (-0.027, -0.014) | 0.021                  | (0.003, 0.04)    | -0.052                 | (-0.064, -0.039) |
| MY | 0.023           | (0, 0.045)       | 0.018                 | (-0.007, 0.034)  | 0.031                  | (0.007, 0.057)   | 0.025                  | (0.001, 0.045)   |
| PH | -0.019          | (-0.038, 0.002)  | -0.018                | (-0.025, -0.01)  | -0.016                 | (-0.035, 0.003)  | -0.027                 | (-0.046, -0.007) |
| SG | -0.026          | (-0.033, -0.019) | -0.003                | (-0.008, 0.003)  | -0.026                 | (-0.033, -0.02)  | -0.021                 | (-0.027, -0.014) |
| TH | -0.118          | (-0.143, -0.094) | -0.067                | (-0.087, -0.049) | -0.123                 | (-0.147, -0.099) | -0.12                  | (-0.143, -0.098) |
| VN | -0.018          | (-0.038, 0.002)  | -0.041                | (-0.06, -0.022)  | -0.012                 | (-0.032, 0.006)  | -0.04                  | (-0.059, -0.02)  |

Posterior means and 95% credible intervals for the state coefficient governing change from baseline mobility in residential areas using different serial interval estimates. Incubation period is kept fixed using Linton et Al's estimate.

### 9.3 Model Fit

|    | Du <sup>1</sup> |                | Nishiura <sup>2</sup> |                | Gayani SG <sup>3</sup> |                | Gayani CH <sup>4</sup> |                |
|----|-----------------|----------------|-----------------------|----------------|------------------------|----------------|------------------------|----------------|
|    | MAE             | R <sup>2</sup> | MAE                   | R <sup>2</sup> | MAE                    | R <sup>2</sup> | MAE                    | R <sup>2</sup> |
| IN | 0.32            | 0.53           | 0.09                  | 0.80           | 0.34                   | 0.53           | 0.27                   | 0.64           |
| KH | 0.19            | 0.47           | 0.04                  | 0.98           | 0.20                   | 0.40           | 0.17                   | 0.76           |
| LA | 0.06            | 0.89           | 0.02                  | 0.99           | 0.07                   | 0.91           | 0.06                   | 0.84           |
| MS | 0.44            | 0.01           | 0.14                  | 0.72           | 0.46                   | 0.02           | 0.41                   | 0.28           |
| MY | 0.10            | 0.61           | 0.06                  | 0.68           | 0.11                   | 0.68           | 0.10                   | 0.63           |
| PH | 0.38            | 0.03           | 0.16                  | 0.55           | 0.42                   | 0.02           | 0.36                   | 0.08           |
| SG | 0.28            | 0.51           | 0.14                  | 0.05           | 0.31                   | 0.48           | 0.27                   | 0.44           |
| TH | 0.38            | 0.45           | 0.09                  | 0.90           | 0.42                   | 0.42           | 0.35                   | 0.57           |
| VN | 0.26            | 0.10           | 0.05                  | 0.91           | 0.27                   | 0.04           | 0.23                   | 0.39           |

Model fit for the state equation using different serial interval estimates. Incubation period is kept fixed using Linton et Al's estimate.

## 10 Sensitivity Analysis on Incubation Period

### Analysis summary

We conducted sensitivity analysis on incubation period estimates by specifying different incubation period taken from literature while keeping the serial interval fixed at Ferguson et al. 2020’s estimate. State coefficient estimates with the incubation period varied are mostly negative, with the direction and effect sizes following that of the primary analysis given in the main manuscript.

### 10.1 Incubation Period Estimates

| Incubation Period (days) | Reference                              |
|--------------------------|----------------------------------------|
| 5.6 (95% CI: 5.0, 6.3)   | Natalie M Linton et al. 2020           |
| 5.1 (95% CI: 4.5, 5.8)   | Lauer et al. 2020                      |
| 6.4 (95% CrI: 5.6, 7.7)  | Backer, Klinkenberg, and Wallinga 2020 |
| 4.9 (95% CI: 4.4, 5.5)   | Jiang, Rayner, and Luo 2020            |
| 5.4 (95% CI: 4.8, 6.0)   | Yang et al. 2020                       |

Incubation period estimates taken from literature

### 10.2 State Coefficient Estimates

|    | Lauer <sup>1</sup> |                  | Backer <sup>2</sup> |                  | Jiang <sup>3</sup> |                  | Yang <sup>4</sup> |                  |
|----|--------------------|------------------|---------------------|------------------|--------------------|------------------|-------------------|------------------|
|    | Mean               | 95% CrI          | Mean                | 95% CrI          | Mean               | 95% CrI          | Mean              | 95% CrI          |
| IN | -0.101             | (-0.114, -0.087) | -0.106              | (-0.122, -0.091) | -0.101             | (-0.115, -0.087) | -0.101            | (-0.115, -0.086) |
| KH | -0.163             | (-0.201, -0.123) | -0.144              | (-0.181, -0.102) | -0.143             | (-0.18, -0.112)  | -0.15             | (-0.193, -0.118) |
| LA | -0.039             | (-0.065, -0.014) | -0.035              | (-0.085, 0.011)  | -0.031             | (-0.059, -0.008) | -0.012            | (-0.035, 0.012)  |
| MS | -0.049             | (-0.055, -0.042) | -0.055              | (-0.062, -0.049) | -0.048             | (-0.054, -0.041) | -0.047            | (-0.053, -0.041) |
| MY | 0.037              | (0.021, 0.055)   | 0.033               | (0.016, 0.056)   | 0.034              | (0.019, 0.05)    | 0.039             | (0.012, 0.054)   |
| PH | -0.038             | (-0.046, -0.031) | -0.039              | (-0.048, -0.03)  | -0.037             | (-0.045, -0.03)  | -0.037            | (-0.045, -0.028) |
| SG | -0.007             | (-0.012, -0.002) | -0.008              | (-0.013, -0.003) | -0.007             | (-0.012, -0.002) | -0.007            | (-0.012, -0.003) |
| TH | -0.134             | (-0.148, -0.12)  | -0.138              | (-0.155, -0.121) | -0.134             | (-0.149, -0.118) | -0.138            | (-0.154, -0.124) |
| VN | -0.062             | (-0.081, -0.043) | -0.065              | (-0.085, -0.047) | -0.06              | (-0.077, -0.042) | -0.062            | (-0.082, -0.044) |

Posterior means and 95% credible intervals for the state coefficient governing change from baseline mobility in residential areas using different incubation period estimates. Serial interval is kept fixed using Ferguson et Al’s estimate.

### 10.3 Model Fit

|    | Lauer <sup>1</sup> |                | Backer <sup>2</sup> |                | Jiang <sup>3</sup> |                | Yang <sup>4</sup> |                |
|----|--------------------|----------------|---------------------|----------------|--------------------|----------------|-------------------|----------------|
|    | MAE                | R <sup>2</sup> | MAE                 | R <sup>2</sup> | MAE                | R <sup>2</sup> | MAE               | R <sup>2</sup> |
| IN | 0.17               | 0.90           | 0.19                | 0.88           | 0.17               | 0.90           | 0.17              | 0.90           |
| KH | 0.12               | 0.93           | 0.12                | 0.90           | 0.11               | 0.93           | 0.10              | 0.94           |
| LA | 0.04               | 0.96           | 0.03                | 0.95           | 0.03               | 0.95           | 0.03              | 0.72           |
| MS | 0.25               | 0.82           | 0.26                | 0.83           | 0.24               | 0.82           | 0.23              | 0.83           |
| PH | 0.26               | 0.66           | 0.29                | 0.58           | 0.26               | 0.66           | 0.26              | 0.64           |
| SG | 0.24               | 0.11           | 0.25                | 0.13           | 0.23               | 0.12           | 0.23              | 0.13           |
| TH | 0.24               | 0.86           | 0.27                | 0.84           | 0.25               | 0.86           | 0.22              | 0.89           |
| VN | 0.13               | 0.83           | 0.12                | 0.84           | 0.13               | 0.81           | 0.12              | 0.84           |

Model fit for the state equation using different incubation period estimates. Serial interval is kept fixed using Ferguson et Al’s estimate.

## References

- Backer, Jantien A, Don Klinkenberg, and Jacco Wallinga (2020). “Incubation period of 2019 novel coronavirus (2019-nCoV) infections among travellers from Wuhan, China, 20–28 January 2020”. In: *Eurosurveillance* 25.5. DOI: 10.2807/1560-7917.es.2020.25.5.2000062.
- Du, Zhanwei et al. (2020). “Serial Interval of COVID-19 among Publicly Reported Confirmed Cases”. In: *Emerging Infectious Diseases* 26.6, pp. 1341–1343. DOI: 10.3201/eid2606.200357.
- Ferguson, Neil et al. (2020). “Report 9: Impact of non-pharmaceutical interventions (NPIs) to reduce COVID19 mortality and healthcare demand”. In: *MRC Centre for Global Infectious Disease Analysis, COVID-19 Reports*. DOI: 10.25561/77482.
- Ganyani, Tapiwa et al. (2020). “Estimating the generation interval for coronavirus disease (COVID-19) based on symptom onset data, March 2020”. In: *Eurosurveillance* 25.17. DOI: 10.2807/1560-7917.es.2020.25.17.2000257.
- Jiang, Xuan, Simon Rayner, and Min-Hua Luo (2020). “Does SARS-CoV-2 has a longer incubation period than SARS and MERS?” In: *Journal of Medical Virology* 92.5, pp. 476–478. DOI: 10.1002/jmv.25708.
- Lauer, Stephen A. et al. (2020). “The Incubation Period of Coronavirus Disease 2019 (COVID-19) From Publicly Reported Confirmed Cases: Estimation and Application”. In: *Annals of Internal Medicine* 172.9, pp. 577–582. DOI: 10.7326/m20-0504.
- Linton, Natalie M et al. (2020). “Incubation period and other epidemiological characteristics of 2019 novel coronavirus infections with right truncation: a statistical analysis of publicly available case data”. In: *Journal of Clinical Medicine* 9.2, p. 538. DOI: 10.3390/jcm9020538.
- Nishiura, Hiroshi, Natalie M. Linton, and Andrei R. Akhmetzhanov (2020). “Serial interval of novel coronavirus (COVID-19) infections”. In: *International Journal of Infectious Diseases* 93, pp. 284–286. DOI: 10.1016/j.ijid.2020.02.060.
- Yang, Lin et al. (2020). “Estimation of incubation period and serial interval of COVID-19: analysis of 178 cases and 131 transmission chains in Hubei province, China”. In: *Epidemiology and Infection* 148. DOI: 10.1017/s0950268820001338.
